# Supplementary material
Source: HighWire-hosted journal article supplement (https://jnm.snmjournals.org/highwire/filestream/104765/field_highwire_adjunct_files/0/258376_Supplemental_Data.pdf)
Supplement: 258376_Supplemental_Data.pdf [file 258376_Supplemental_Data.pdf]

### Supplemental TABLE 1

#### Previous Treatments of the Patients of this Study

| Characteristics           | Patient 1                                                                                                                                                                                                                          | Patient 2                                                                                                                                                                                                                                                                                                                                                                                                                                                                           |
|---------------------------|------------------------------------------------------------------------------------------------------------------------------------------------------------------------------------------------------------------------------------|-------------------------------------------------------------------------------------------------------------------------------------------------------------------------------------------------------------------------------------------------------------------------------------------------------------------------------------------------------------------------------------------------------------------------------------------------------------------------------------|
| Relevant previous surgery | 09-10/2011: Embolization, followed by right neck dissection (partial excision of right glomus caroticum tumor, paraganglioma) and lymphadenectomy<br>01/2017: Partial excision of residual right cervical tumor and of lymph nodes | 10/1996: Left partial pancreatectomy (primary tumor size 8.6 cm) and Splenectomy.<br>03/2017: Right hemihepatectomy, Excision of hepatic segment 3, extirpation of lymph nodes in hepatoduodenal ligament area, and tumor excision from teres as well as falciform ligaments, peritoneal adhesiolysis, cholecystectomy                                                                                                                                                              |
| Other relevant treatment  | 12/2011: Radiochemotherapy (59.4 Gy to the right neck, Carboplatin)                                                                                                                                                                | 06-09/2016: Treatment with Everolimus (ceased due to severe stomatitis)                                                                                                                                                                                                                                                                                                                                                                                                             |
| Previous PRRT             | 04/2017: 6800 MBq <sup>177</sup> Lu-DOTATOC i.v.<br>07/2017: 7100 MBq <sup>177</sup> Lu-DOTATOC i.v.                                                                                                                               | 01/2005: 4600 MBq <sup>90</sup> Y-DOTATATE i.a.<br>05/2005: 4000 MBq <sup>90</sup> Y-DOTATATE i.a.<br>09/2005: 4100 MBq <sup>90</sup> Y-DOTATATE i.a.<br>07/2006: 7000 MBq <sup>177</sup> Lu-DOTATATE i.v.<br>02/2013: 7500 MBq <sup>177</sup> Lu-DOTATATE i.v.<br>05/2013: 8300 MBq <sup>177</sup> Lu-DOTATATE i.v.<br>05/2015: 5900 MBq <sup>177</sup> Lu-DOTATATE i.v.<br>08/2017: 6000 MBq <sup>177</sup> Lu-DOTA-LM3 i.v.<br>11/2017: 5800 MBq <sup>177</sup> Lu-DOTA-LM3 i.v. |

NEN: neuroendocrine neoplasm; i.a.: intra-arterial; i.v.: intravenous; N/A: not available

## Supplemental TABLE 2

Laboratory Parameters of the Patients Before and After <sup>161</sup>Tb-DOTATOC Administration

| Parameters           | Normal range | Units                     | Patient 1            |                     | Patient 2            |                     |
|----------------------|--------------|---------------------------|----------------------|---------------------|----------------------|---------------------|
|                      |              |                           | Before<br>(02.07.18) | After<br>(26.03.19) | Before<br>(07.11.18) | After<br>(19.12.18) |
| Hemoglobin           | 8.6–12.1     | mmol/L                    | 9.0                  | 9.3                 | 7.7                  | 6.4                 |
| Leukocytes           | 4.3–10       | Gpt/L                     | 7.5                  | 8.4                 | 8.6                  | 8.5                 |
| Thrombocytes         | 150–400      | Gpt/L                     | 193                  | 166                 | 366                  | 377                 |
| Urea                 | 3–9.2        | mmol/L                    | 2.6                  | 2.3                 | 6.2                  | 8.9                 |
| Creatinine           | 62–106       | μmol/L                    | 46.5                 | 55.6                | 115.3                | 111.6               |
| eGFR (MDRD)          | >60          | mL/min/1.73m <sup>2</sup> | >60                  | >60                 | 57.6                 | 59.8                |
| ALT                  | <0.83        | μmol/s/L                  | 0.61                 | 0.73                | 1.02                 | 0.55                |
| AST                  | <0.85        | μmol/s/L                  | 0.48                 | 0.53                | 1.13                 | 1.29                |
| GGT                  | 0.17–1.19    | μmol/s/L                  | 1.17                 | 1.16                | 7.98                 | 15.18               |
| CRP                  | <5           | mg/L                      | 49.6                 | 46.4                | 9.7                  | 62.6                |
| <b>Tumor markers</b> |              |                           |                      |                     |                      |                     |
| NSE                  | <16.3        | ng/mL                     | -                    | -                   | 45.2                 | 88.8                |
| Chromogranin A       | 0–100        | μg/L                      | -                    | -                   | 523                  | 514                 |
| Metanephrine         | 0–90         | ng/L                      | 33.8                 | <30                 | -                    | -                   |
| Normetanephrine      | 0–180        | ng/L                      | 99.4                 | 123.5               | -                    | -                   |

“Before”: 1 day before the application of <sup>161</sup>Tb-DOTATOC; “After”: at the time of the next individually planned clinical visit for follow-up.

ALT, alanine transaminase; AST, aspartate transaminase; eGFR, estimated glomerular filtration rate; GGT: gamma-glutamyl transpeptidase; MDRD: modification of diet in renal disease; CRP: C-reactive protein; NSE: Neuron-specific enolase

### Supplemental TABLE 3

#### Dosimetry Data for $^{161}\text{Tb}$ -DOTATOC Administered to Patient 1 and Patient 2

| Organ/Tissue | Effective half-life in h |                    | Mean absorbed dose in Gy/GBq <sup>1)</sup> |                    |
|--------------|--------------------------|--------------------|--------------------------------------------|--------------------|
|              | Patient 1                | Patient 2          | Patient 1                                  | Patient 2          |
| Whole body   | 55                       | 52                 | 0.04                                       | 0.07               |
| Kidneys      | 44                       | 51                 | 0.8                                        | 1.5                |
| Liver        | 57                       | n.d. <sup>1)</sup> | 0.1                                        | n.d. <sup>1)</sup> |
| Spleen       | 78                       | n.d. <sup>2)</sup> | 1.2                                        | n.d. <sup>2)</sup> |

<sup>1)</sup> The calibration reference for planar scans of Patient 1 was the whole-body scan. As Patient 2 emptied the bladder before the first scan, the simultaneously scanned vial had to be used as a reference.

<sup>2)</sup> As Patient 2 had multiple liver metastases, the mean absorbed dose to the liver could not be determined.

<sup>3)</sup> As Patient 2 underwent splenectomy, a mean absorbed dose to the spleen could not be determined.
